# Supplementary material for: Accumulated or continuous exercise for glycaemic regulation and control: a systematic review with meta-analysis
Source: PubMed Central journal article supplement — BMJ Open Sport Exerc Med. 2018 Dec 17;4(1):e000470. doi: 10.1136/bmjsem-2018-000470 (PMC6350746; doi:10.1136/bmjsem-2018-000470), 2018-12-17
Supplement: bmjsem-2018-000470supp001.pdf [file bmjsem-2018-000470supp001.pdf]

**Supplementary Table 1.** PICO terms used in search engines.

| Population           | Intervention        | Comparator     | Outcome               |
|----------------------|---------------------|----------------|-----------------------|
| (Adult*              | “Physical Exercise” | Continu*       | Glucose               |
| Young Adult*         | “Physical Activity” | “Long bout*”   | “Glucose intoleran*”  |
| Middle*Age*)         | “Physical Training” | “Single bout*” | “Blood glucose”       |
| AND                  | Training            |                | *Insulin*             |
| Inactiv*             | Exercise            |                | “Insulin sensitivity” |
| Sedentary            | “Intermittent       |                | “Insulin resistance”  |
|                      | Exercise”           |                | *Glyc*mi*             |
|                      | “Interval Exercise” |                |                       |
|                      | “Short bout*”       |                |                       |
|                      | “Long bout*”        |                |                       |
|                      | “Exercise snack*”   |                |                       |
|                      | Accumulated         |                |                       |
| <b>MeSH Terms</b>    |                     |                |                       |
| Population           | Intervention        | Comparator     | Outcome               |
| Adult+               | Physical Activity   |                | Glucose               |
| Young Adult          | Exercise            |                | Glucose Metabolism    |
| Middle Age           |                     |                | disorders             |
| Lifestyle, Sedentary |                     |                | Blood glucose         |
|                      |                     |                | Insulin               |
|                      |                     |                | Insulin Sensitivity   |
|                      |                     |                | Insulin Resistance    |
