# Supplementary material for: Accumulated or continuous exercise for glycaemic regulation and control: a systematic review with meta-analysis
Source: PubMed Central journal article supplement — BMJ Open Sport Exerc Med. 2018 Dec 17;4(1):e000470. doi: 10.1136/bmjsem-2018-000470 (PMC6350746; doi:10.1136/bmjsem-2018-000470), 2018-12-17
Supplement: bmjsem-2018-000470supp002.pdf [file bmjsem-2018-000470supp002.pdf]

**Supplementary Table 2.** RCTs not included in meta-analyses with reasons.

| Study                                                                                                                                                                                                                                                                                                                                                                                                                                                                                                                                                                                                                                                                        | Reason for not being included in meta-analysis.                                                                           |
|------------------------------------------------------------------------------------------------------------------------------------------------------------------------------------------------------------------------------------------------------------------------------------------------------------------------------------------------------------------------------------------------------------------------------------------------------------------------------------------------------------------------------------------------------------------------------------------------------------------------------------------------------------------------------|---------------------------------------------------------------------------------------------------------------------------|
| <p>S. Anderssen, Holme, Urdal, and Hjermann (1995)<br/> Bajpeyi et al. (2009)<br/> Church, Earnest, Skinner, and Blair (2007)<br/> Huffman et al. (2014)<br/> Johnson et al. (2007)<br/> Larose et al. (2011)<br/> Slentz et al. (2009)<br/> Stensvold, et al. (2010)</p>                                                                                                                                                                                                                                                                                                                                                                                                    | <p>Data reported in multiple articles from the same study.</p>                                                            |
| <p>Davey, et al. (2000)<br/> Diabetes Prevention Program Research Group et al. (2015)<br/> Earnest, Poirier, Carnethon, Blair, and Church (2010)<br/> Foster-Schubert et al. (2005)<br/> Frank et al. (2005)<br/> Katzel et al. (1995)<br/> Mason et al. (2011)<br/> Mason et al. (2013)<br/> Mendham et al. (2015)<br/> Ross, Hudson, Stotz, and Lam (2015)<br/> Swift, Johannsen, Earnest, Blair, and Church (2012)<br/> Yeater, Ullrich, Maxwell, and Goetsch (1990)</p>                                                                                                                                                                                                  | <p>Data incomplete or not in a format that could be used.</p>                                                             |
| <p>Monteiro, Fiani, Freitas, Zanetti, and Foss (2010)</p>                                                                                                                                                                                                                                                                                                                                                                                                                                                                                                                                                                                                                    | <p>Control group received an intervention likely to affect measured outcomes.</p>                                         |
| <p>S. A. Anderssen, Hjermann, Urdal, Torjesen, and Holme (1996)<br/> Andersson, Sjodin, Olsson, and Vessby (1998)<br/> Arikawa, Kurzer, Thomas, and Schmitz (2010)<br/> Blumenthal et al. (2000)<br/> Cooper, Collins, Adams, Robergs, and Donges (2016)<br/> Connolly et al. (2016)<br/> Dengel, Pratley, Hagberg, Rogus, and Goldberg (1996).<br/> Earnest et al. (2013).<br/> Lamina, Okoye, and Hanif (2013).<br/> Nikseresht, et al. (2014).<br/> Ong et al. (2009).<br/> Sim, et al. (2015).<br/> Trapp, Chisholm, Freund, and Boutcher (2008).<br/> Wiklund et al. (2014).<br/> Woolf-May, Scott, Kearney, and Jones (2011).<br/> Xie, Hui, Kwok, and Woo (2015).</p> | <p>Outcomes measured &gt;48 h after final exercise bout, or time outcomes measured after final exercise bout unclear.</p> |
